# Supplementary material for: Genetic Modifiers of Non-Penetrance and RNA Expression Levels in PRPF31-Associated Retinitis Pigmentosa in a Danish Cohort
Source: MDPI journal article supplement (doi:10.3390/genes14020435), 2023-02-08
Supplement: s1 [file s1]

## Supplementary material

**Table S1.** *PRPF31*-variants identified in this study. 18 individuals with RP and 5 non-penetrant carriers were included for mRNA analyses. 37 individuals + 10 non-carrier relatives were included for MSR1 analyses. The genetic variants have previously been published [1].

| <i>PRPF31</i> variant                 |                       |                                            | n, mRNA<br>expression<br>RP (NPC) | n,<br>MSR1 |
|---------------------------------------|-----------------------|--------------------------------------------|-----------------------------------|------------|
| Nucleotide change                     | Amino acid change     | Classification (ACMG)                      |                                   |            |
| c.421-2A>G                            | p.?                   | Likely pathogenic (PVS1, PM2_sup)          | 3                                 | 7          |
| c.666_668del                          | p.(Ile223del)         | VUS (PM2_sup, PM4)                         | 2                                 | 3          |
| c.828_829delCA                        | p.(His276Glnfs*2)     | Pathogenic (PVS1, PS4_sup, PM2_sup)        | 1                                 | 1          |
| c.855+1G>T                            | p.?                   | Likely pathogenic (PVS1, PM2_sup)          | 1 (1)                             | 3          |
| c.1234delG                            | p.(Val412*)           | Likely pathogenic (PVS1, PM2_sup)          | 3 (2)                             | 5          |
| c.(-9+1_1-1)_(420+1_421-1)dup         | Duplication exons 2-5 | Likely pathogenic (PVS1_str, PS4_sup, PP1) | 3                                 | 4          |
| c.(-9+1_1-1)_(238+1_239-1)del         | Deletion exons 2-3    | Pathogenic (PVS1, PM2_sup, PS4)            | 1                                 | 5          |
| g.(54619177_54621659)_(54634972_?)del | Deletion exons 2-14   | Pathogenic (PVS1, PM2_sup, PS4)            | 4 (2)                             | 6          |
| c.1190dup                             | p.(His398Profs*77)    | Pathogenic (PVS1, PS4_sup, PM2_sup)        | -                                 | 1          |
| c.961A>T                              | p.(Lys321*)           | Likely pathogenic (PVS1, PM2_sup)          | -                                 | 1          |
| c.997del                              | p.(Glu333Serfs*5)     | Pathogenic (PVS1, PS4_sup, PM2_sup)        | -                                 | 1          |

*PRPF31*: NM\_015629.4, VUS: variant of unknown significance, sup: supportive, str: strong. n refers to the number of subjects included in the respective analysis.

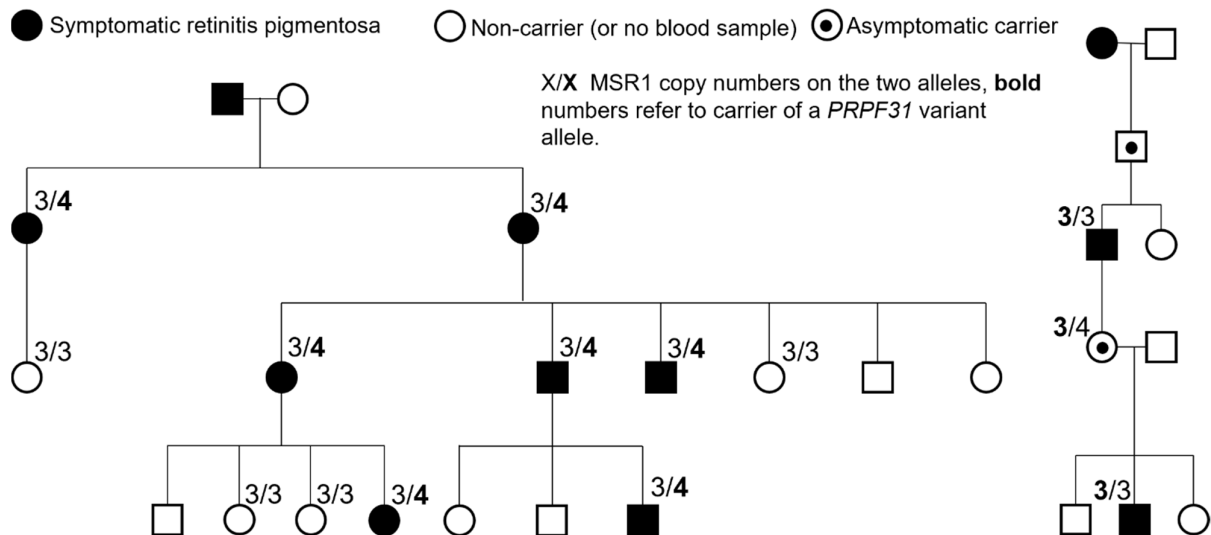

**Figure S1.** Pedigrees showing examples from two of the RP11 families. In those individuals who had a sample stored in the DNA-bank the two allele's MSR1 copy number were analyzed and highlighted with numbers in the figure. In family 1 (left), the *PRPF31*-variant was on a 4-copy allele, as non-carriers had 3/3 alleles. In family 2 (right), the *PRPF31*-variant was on the 3-copy allele demonstrated by the segregation with a non-penetrant carrier, carrying a 4-copy WT allele, between two affected individuals with a 3/3 genotype.

1. Lisbjerg, K.; Bertelsen, M.; Lyng Forman, J.; Grønskov, K.; Prener Holtan, J.; Kessel, L. Disease Progression of Retinitis Pigmentosa Caused by *PRPF31* Variants in a Nordic Population: A Retrospective Study with up to 36 Years Follow-Up. *Ophthalmic Genet.* **2022**, 1–8. <https://doi.org/10.1080/13816810.2022.2123006>.
